# Supplementary material
Source: Springer Nature journal article supplement (https://www.springermedizin.de/resource/supplementary/12985_2010_908_MOESM6_ESM.pdf/9608714)
Supplement: MOESM6 [file 9608714]

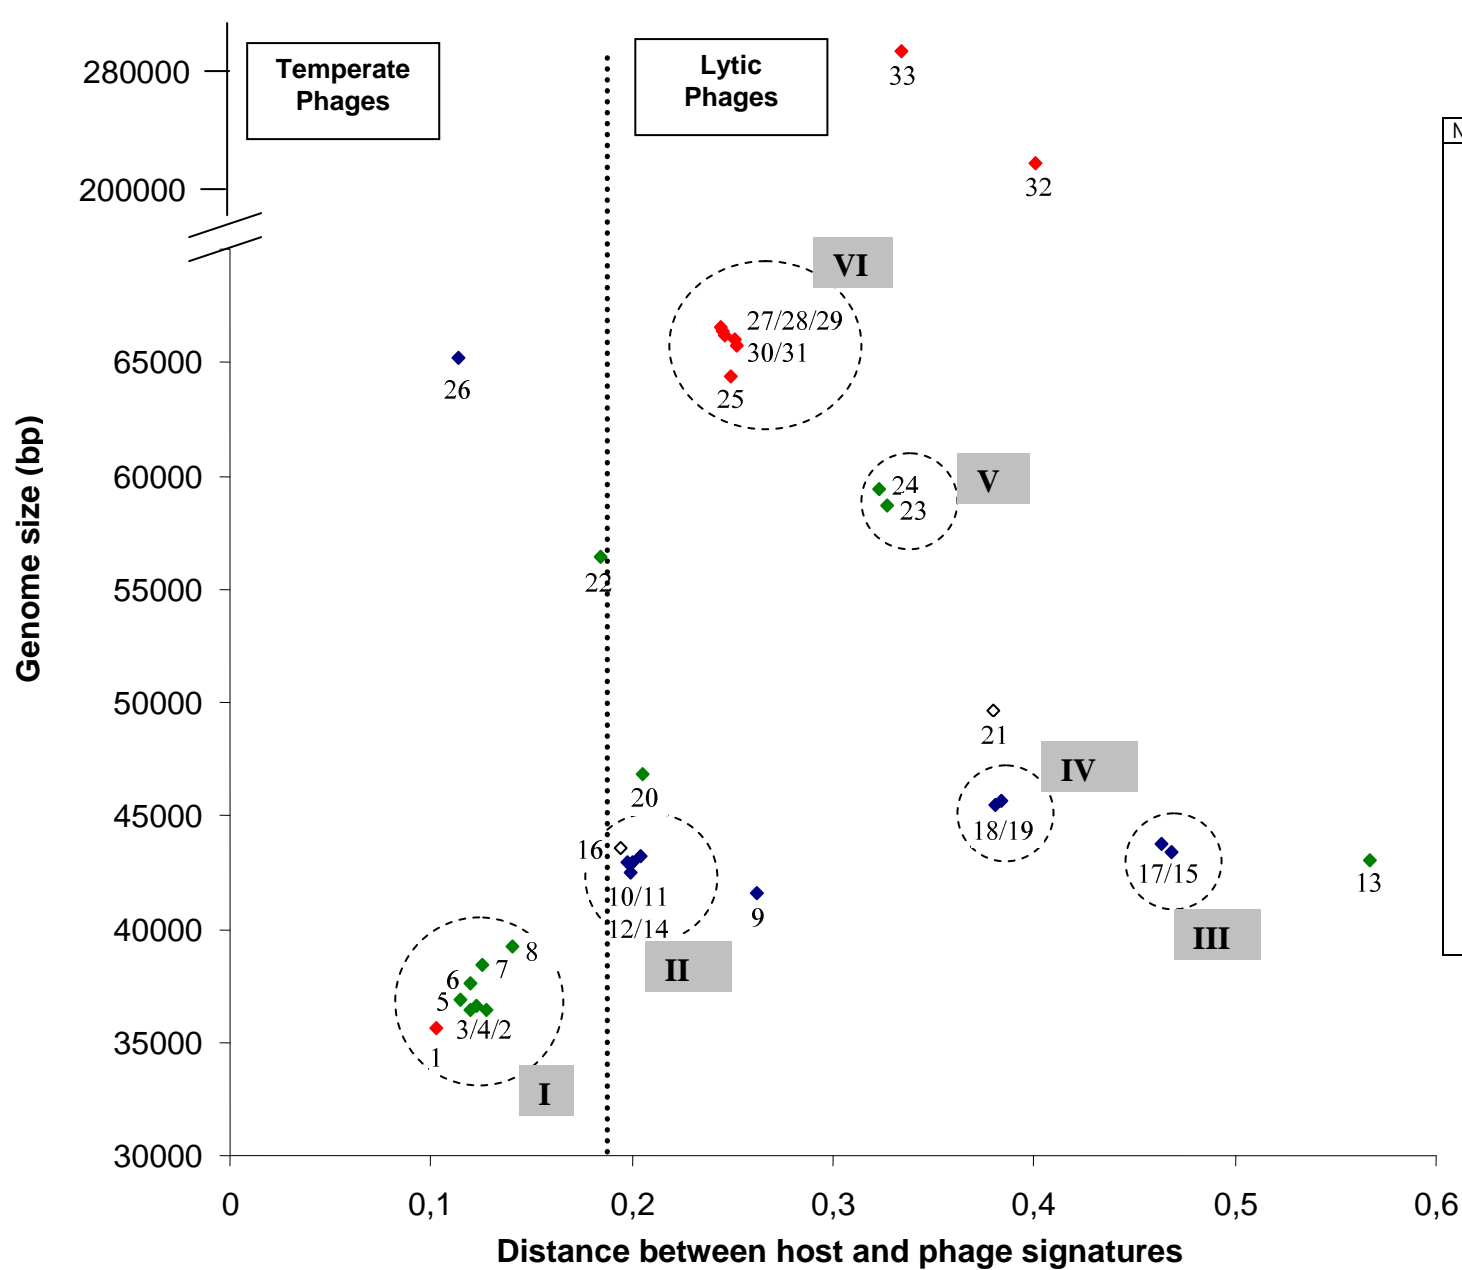

| Number | name   | Genome size | Accession | Reference     |
|--------|--------|-------------|-----------|---------------|
| 1      | phiCTX | 35580       | NC_003278 | [105]         |
| 2      | MP22   | 36409       | NC_009818 | [64]          |
| 3      | DMS3   | 36415       | NC_008717 | [106]         |
| 4      | MP29   | 36632       | NC_011613 | not published |
| 5      | MP38   | 36885       | NC_011611 | not published |
| 6      | D3112  | 37611       | NC_005178 | [107]         |
| 7      | B3     | 38439       | NC_006548 | [65]          |
| 8      | F10    | 39199       | NC_007805 | [62]          |
| 9      | LKA1   | 41593       | NC_009936 | [66]          |
| 10     | phiKMV | 42519       | NC_005045 | [108]         |
| 11     | PT5    | 42954       | NC_011105 | not published |
| 12     | PT2    | 42961       | NC_011107 | not published |
| 13     | 73     | 42999       | NC_007806 | [62]          |
| 14     | LKD16  | 43200       | NC_009935 | [66]          |
| 15     | 119X   | 43365       | NC_007807 | [62]          |
| 16     | LUZ19  | 43548       | NC_010326 | not published |
| 17     | PaP2   | 43783       | NC_005884 | not published |
| 18     | PaP3   | 45503       | NC_004466 | [69]          |
| 19     | LUZ24  | 45625       | NC_010325 | [70]          |
| 20     | PAJU2  | 46872       | NC_011373 | [67]          |
| 21     | PA11   | 49639       | NC_007808 | [62]          |
| 22     | D3     | 56425       | NC_002484 | [71]          |
| 23     | YuA    | 58663       | NC_010116 | [68]          |
| 24     | M6     | 59446       | NC_007809 | [62]          |
| 25     | LBL3   | 64427       | NC_011165 | not published |
| 26     | F116   | 65195       | NC_006552 | [109]         |
| 27     | PB1    | 65764       | NC_011810 | not published |
| 28     | F8     | 66015       | NC_007810 | [62]          |
| 29     | 14-1   | 66235       | NC_011703 | not published |
| 30     | SN     | 66390       | NC_011756 | not published |
| 31     | LMA2   | 66530       | NC_011166 | not published |
| 32     | EL     | 211215      | NC_007623 | [110]         |
| 33     | phiKZ  | 280334      | NC_004629 | [111]         |
